# Supplementary material
Source: PubMed Central journal article supplement (PMC4972656)

# Supplementary Data Set 1. Uncropped gel for Figure 1

Size exclusion chromatography for COG complex in Figure 1

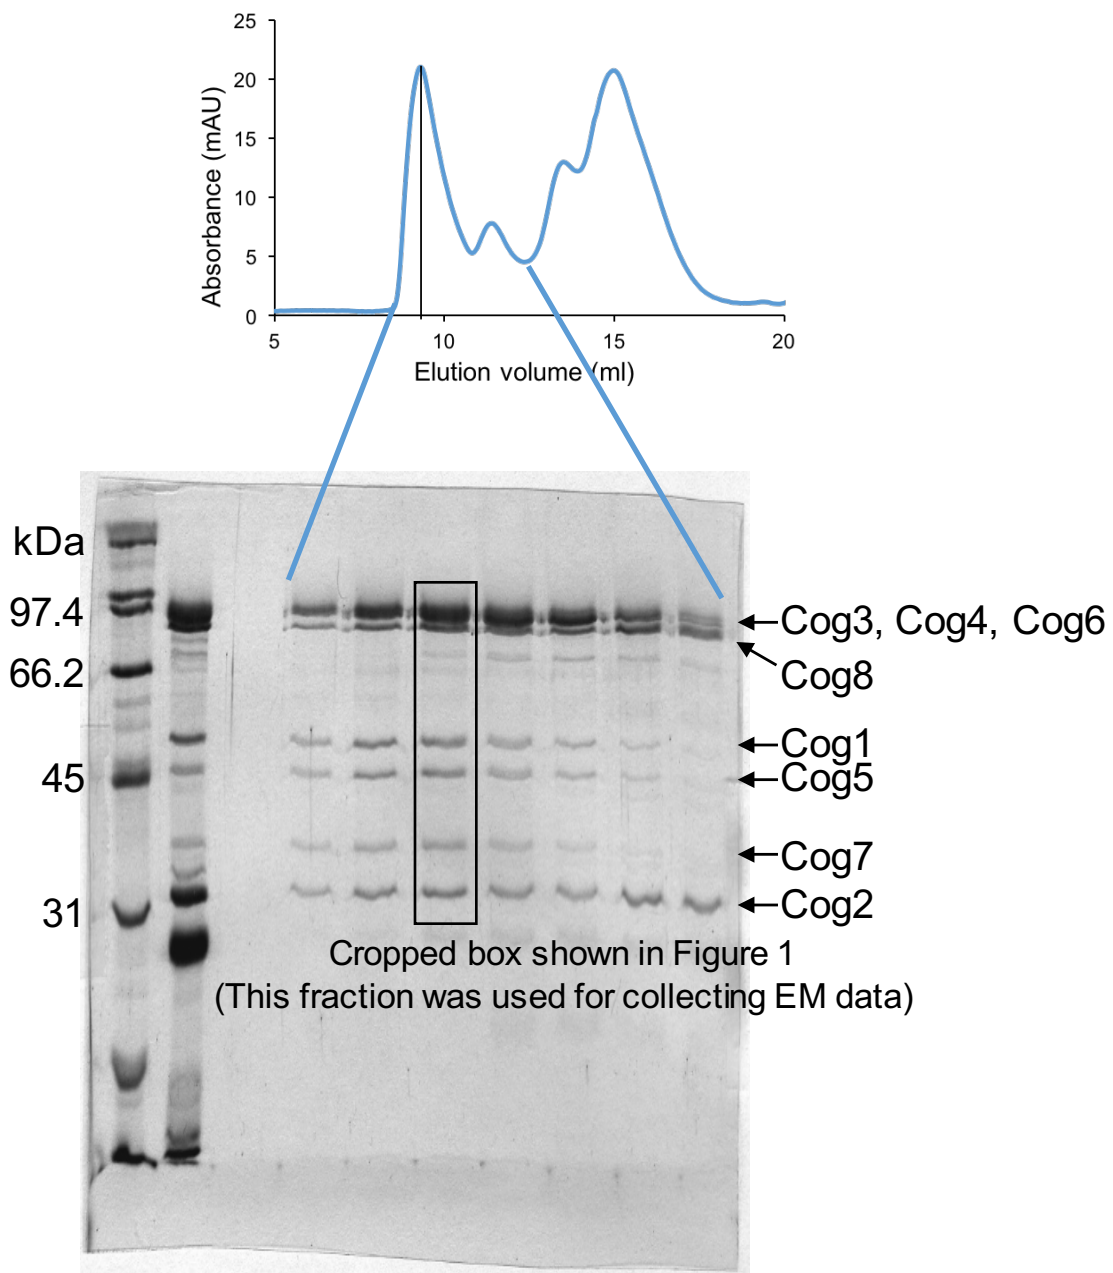

Supplement: NIHMS796854-supplement-2.pdf [file NIHMS796854-supplement-2.pdf]
