# Supplementary material
Source: PubMed Central journal article supplement (PMC4972656)
Supplement: NIHMS796854-supplement-3.pdf [file NIHMS796854-supplement-3.pdf]

**Supplementary Table 1.** Yeast COG interactome.

| COG subunit | Partner | Class  | Reference |
|-------------|---------|--------|-----------|
| Cog1        | COPI    | Coat   | 1         |
| Cog2        | Sed5    | SNARE  | 1         |
|             | Ypt1    | Rab    | 1         |
|             | Ypt6    | Rab    | 1         |
|             | COPI    | Coat   | 1         |
|             | Sec21   | Coat   | 1         |
| Cog3        | Sed5    | SNARE  | 1         |
|             | Ykt6    | SNARE  | 1         |
|             | Gos1    | SNARE  | 1         |
|             | Sec22   | SNARE  | 1         |
|             | Ypt1    | Rab    | 1         |
|             | Ypt6    | Rab    | 1         |
|             | Vps52   | Tether | 2         |
|             | COPI    | Coat   | 1         |
| Cog4        | Sed5    | SNARE  | 3         |
|             | Tip20   | Tether | 4         |
|             | COPI    | Coat   | 1         |
| Cog6        | Ypt1    | Rab    | 5         |
|             | Ypt6    | Rab    | 5         |
|             | COPI    | Coat   | 1         |

1. Suvorova, E.S., Duden, R. & Lupashin, V.V. The Sec34/Sec35p complex, a Ypt1p effector required for retrograde intra-Golgi trafficking, interacts with Golgi SNAREs and COPI vesicle coat proteins. *J Cell Biol* **157**, 631-43 (2002).
2. Tarassov, K. et al. An in vivo map of the yeast protein interactome. *Science* **320**, 1465-70 (2008).
3. Shestakova, A., Suvorova, E., Pavliv, O., Khaidakova, G. & Lupashin, V. Interaction of the conserved oligomeric Golgi complex with t-SNARE Syntaxin5a/Sed5 enhances intra-Golgi SNARE complex stability. *J Cell Biol* **179**, 1179-1192 (2007).
4. Uetz, P. et al. A comprehensive analysis of protein-protein interactions in *Saccharomyces cerevisiae*. *Nature* **403**, 623-7 (2000).
5. Yu, H. et al. High-quality binary protein interaction map of the yeast interactome network. *Science* **322**, 104-10 (2008).
